# Supplementary material
Source: PubMed Central journal article supplement (PMC1622782)

**A**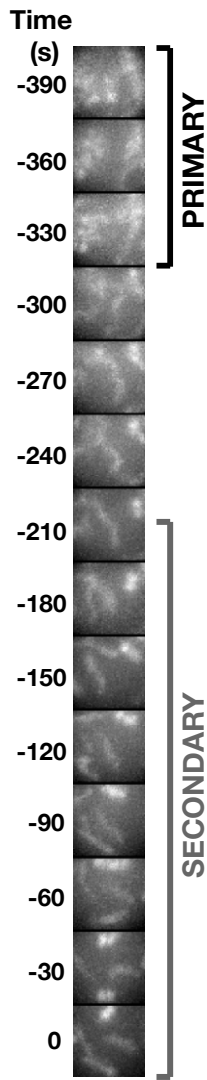**B**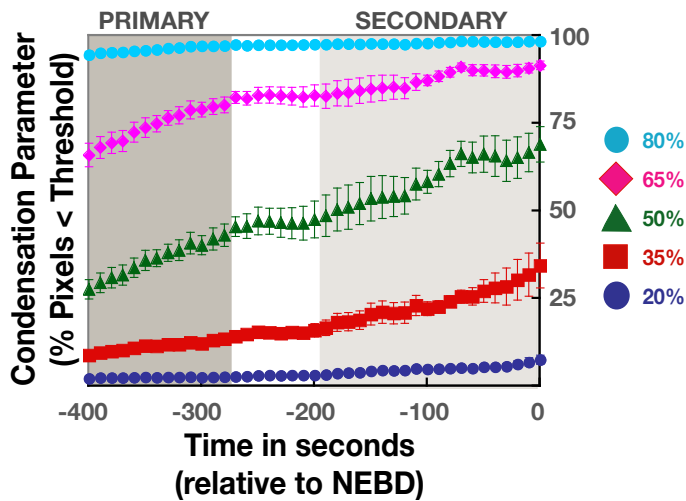

Supplement: pnas_0606993103_1.pdf [file pnas_0606993103_1.pdf]

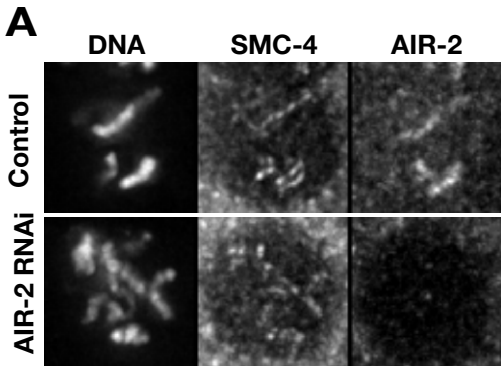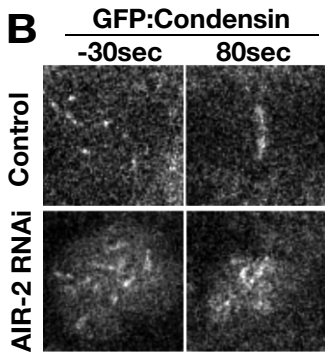

Supplement: pnas_0606993103_2.pdf [file pnas_0606993103_2.pdf]
